# Supplementary material
Source: PubMed Central journal article supplement (PMC7960006)
Supplement: 16-00788.pdf [file 16-00788.pdf]

## ON-LINE REFERENCES

- Lin N, Brouillard AM, Keigher KM, et al. **Utilization of Pipeline embolization device for treatment of ruptured intracranial aneurysms: US multicenter experience.** *J Neurointerv Surg* 2015;7:808–15 CrossRef Medline
- Chalouhi N, Zanaty M, Whiting A, et al. **Treatment of ruptured intracranial aneurysms with the Pipeline embolization device.** *Neurosurgery* 2015;76:165–72; discussion 172 CrossRef Medline
- Yoon JW, Siddiqui AH, Dumont TM, et al; Endovascular Neurosurgery Research Group. **Feasibility and safety of Pipeline embolization device in patients with ruptured carotid blister aneurysms.** *Neurosurgery* 2014;75:419–29; discussion 429 CrossRef Medline
- Rösch J, Göllitz P, Struffert T, et al. **Are flow diverting stents a treatment option in acutely ruptured complex A1–A2 junction aneurysms?** *Clin Neuroradiol* 2016;26:109–15 CrossRef Medline
- Çinar C, Oran İ, Bozkaya H, et al. **Endovascular treatment of ruptured blister-like aneurysms with special reference to the flow-diverting strategy.** *Neuroradiology* 2013;55:441–47 CrossRef Medline
- Tan LA, Mofthakhar R, Lopes DK. **Treatment of a ruptured vertebrobasilar fusiform aneurysm using pipeline embolization device.** *J Cerebrovasc Endovasc Neurosurg* 2013;15:30–33 CrossRef Medline
- Chan RS, Mak CH, Wong AK, et al. **Use of the Pipeline embolization device to treat recently ruptured dissecting cerebral aneurysms.** *Interv Neuroradiol* 2014;20:436–41 CrossRef Medline
- Cruz JP, O’Kelly C, Kelly M, et al. **Pipeline embolization device in aneurysmal subarachnoid hemorrhage.** *AJNR Am J Neuroradiol* 2013;34:271–76 CrossRef Medline
- McAuliffe W, Wenderoth JD. **Immediate and midterm results following treatment of recently ruptured intracranial aneurysms with the Pipeline embolization device.** *AJNR Am J Neuroradiol* 2012;33:487–93 CrossRef Medline
- Martínez-Galdámez M, Romance A, Vega P, et al. **Pipeline endovascular device for the treatment of intracranial aneurysms at the level of the circle of Willis and beyond: multicenter experience.** *J Neurointerv Surg* 2015;7:816–23 CrossRef Medline
- Munich SA, Tan LA, Keigher KM, et al. **The Pipeline embolization device for the treatment of posterior circulation fusiform aneurysms: lessons learned at a single institution.** *J Neurosurg* 2014;121:1077–84 CrossRef Medline
- Nerva JD, Morton RP, Levitt MR, et al. **Pipeline embolization device as primary treatment for blister aneurysms and iatrogenic pseudoaneurysms of the internal carotid artery.** *J Neurointerv Surg* 2015;7:210–16 CrossRef Medline
- So TY, Mitchell PJ, Dowling RJ, et al. **Efficacy, complications and clinical outcome of endovascular treatment for intracranial intradural arterial dissections.** *Clin Neurol Neurosurg* 2014;117:6–11 CrossRef Medline
- Dornbos D 3rd, Pillai P, Sauvageau E. **Flow diverter assisted coil embolization of a very small ruptured ophthalmic artery aneurysm.** *J Neurointerv Surg* 2016;8:e2–4 CrossRef Medline
- Hu YC, Chugh C, Mehta H, et al. **Early angiographic occlusion of ruptured blister aneurysms of the internal carotid artery using the Pipeline embolization device as a primary treatment option.** *J Neurointerv Surg* 2014;6:740–43 CrossRef Medline
- Ducruet AF, Crowley RW, Albuquerque FC, et al. **Reconstructive endovascular treatment of a ruptured vertebral artery dissecting aneurysm using the Pipeline embolization device.** *J Neurointerv Surg* 2013;5:e20 CrossRef Medline
- Narata AP, Yilmaz H, Schaller K, et al. **Flow-diverting stent for ruptured intracranial dissecting aneurysm of vertebral artery.** *Neurosurgery* 2012;70:982–88; discussion 988–89 CrossRef Medline
- van Rooij WJ, Bechan RS, Peluso JP, et al. **Endovascular treatment of intracranial aneurysms in the flow diverter era: frequency of use and results in a consecutive series of 550 treatments in a single centre.** *Interv Neuroradiol* 2014;20:428–35 CrossRef Medline
- Kulcsár Z, Wetzel SG, Augsburg L, et al. **Effect of flow diversion treatment on very small ruptured aneurysms.** *Neurosurgery* 2010;67:789–93 CrossRef Medline
- Borota L, Gál G, Jonasson P, et al. **Successful treatment of a ruptured aneurysm at the vertebral artery-posterior inferior cerebellar artery junction and simultaneous treatment of the stenotic vertebral artery with a single flow-diverting stent: a case report.** *J Med Case Rep* 2014;8:172 CrossRef Medline

On-line Table: Study Details

| Author                                | Journal                                 | Year | Patients (Mean Age) (yr) | Aneurysms |                | Clinical Outcome Score | FD Type |
|---------------------------------------|-----------------------------------------|------|--------------------------|-----------|----------------|------------------------|---------|
|                                       |                                         |      |                          | No.       | Mean Size (mm) |                        |         |
| Lin et al <sup>1</sup>                | <i>J Neurointerv Surg</i>               | 2015 | 51.4                     | 26        | 9.1            | mRS                    | PED     |
| Chalouhi et al <sup>2</sup>           | <i>Neurosurgery</i>                     | 2015 | 59                       | 20        | 7.2            | mRS                    | PED     |
| Yoon et al <sup>3</sup>               | <i>Neurosurgery</i>                     | 2014 | 48                       | 11        | 2.5            | mRS                    | PED     |
| Rösch et al <sup>4</sup>              | <i>Clin Neuroradiol</i>                 | 2016 | 59                       | 3         | NS             | mRS                    | PED     |
| Çinar et al <sup>5</sup>              | <i>Neuroradiology</i>                   | 2013 | 44.5                     | 6         | 2.9            | mRS                    | PED     |
| Tan et al <sup>6</sup>                | <i>J Cerebrovasc Endovasc Neurosurg</i> | 2013 | 73                       | 1         | 2              | NS                     | PED     |
| Chan et al <sup>7</sup>               | <i>Interv Neuroradiol</i>               | 2014 | 51.8                     | 8         | 5.5            | GOS                    | PED     |
| Cruz et al <sup>8</sup>               | <i>AJNR Am J Neuroradiol</i>            | 2013 | 54.5                     | 20        | 3              | GOS                    | PED     |
| McAuliffe and Wenderoth <sup>9</sup>  | <i>AJNR Am J Neuroradiol</i>            | 2012 | 51.6                     | 11        | 12.2           | mRS                    | PED     |
| Martínez-Galdámez et al <sup>10</sup> | <i>J Neurointerv Surg</i>               | 2015 | 40s                      | 1         | 8.5            | mRS                    | PED     |
| Munich et al <sup>11</sup>            | <i>J Neurosurg</i>                      | 2014 | 65                       | 2         | 10.6           | mRS                    | PED     |
| Nerva et al <sup>12</sup>             | <i>J Neurointerv Surg</i>               | 2015 | 25                       | 2         | 2.1            | mRS                    | PED     |
| So et al <sup>13</sup>                | <i>Clin Neurol Neurosurg</i>            | 2014 | 38                       | 2         | NS             | mRS                    | PED     |
| Dornbos et al <sup>14</sup>           | <i>J Neurointerv Surg</i>               | 2016 | 42                       | 1         | 1.5            | mRS                    | PED     |
| Hu et al <sup>15</sup>                | <i>J Neurointerv Surg</i>               | 2014 | NS                       | 3         | 2.2            | mRS                    | PED     |
| Ducruet et al <sup>16</sup>           | <i>J Neurointerv Surg</i>               | 2013 | 42                       | 1         | NS             | NS                     | PED     |
| Narata et al <sup>17</sup>            | <i>Neurosurgery</i>                     | 2012 | 49.5                     | 2         | 5.1            | NS                     | PED     |
| van Rooij et al <sup>18</sup>         | <i>Interv Neuroradiol</i>               | 2014 | 50                       | 2         | 5.5            | mRS                    | Silk    |
| Kulcsár et al <sup>19</sup>           | <i>Neurosurgery</i>                     | 2010 | 53.3                     | 3         | <2             | NS                     | Silk    |
| Borota et al <sup>20</sup>            | <i>J Med Case Rep</i>                   | 2014 | 68                       | 1         | 11.5           | NS                     | PED     |

Note:—NS indicates not specified; PED, Pipeline Embolization Device.
